# Supplementary material for: A wet-processed, binder-free sulfur cathode integrated with a dual-functional separator for flexible Li–S batteries
Source: Royal Society of Chemistry journal article supplement (doi:10.1039/c9nr10966h), 2020-01-01
Supplement: c9nr10966h1.pdf [file c9nr10966h1.pdf]

## **Supporting Information**

### **A Wet-processed, Binder-free Sulfur Cathode Integrated with Dual-functional Separator for Flexible Li-S Batteries**

Xuewei Fu, Francis Dunne, Min Chen and Wei-Hong Zhong

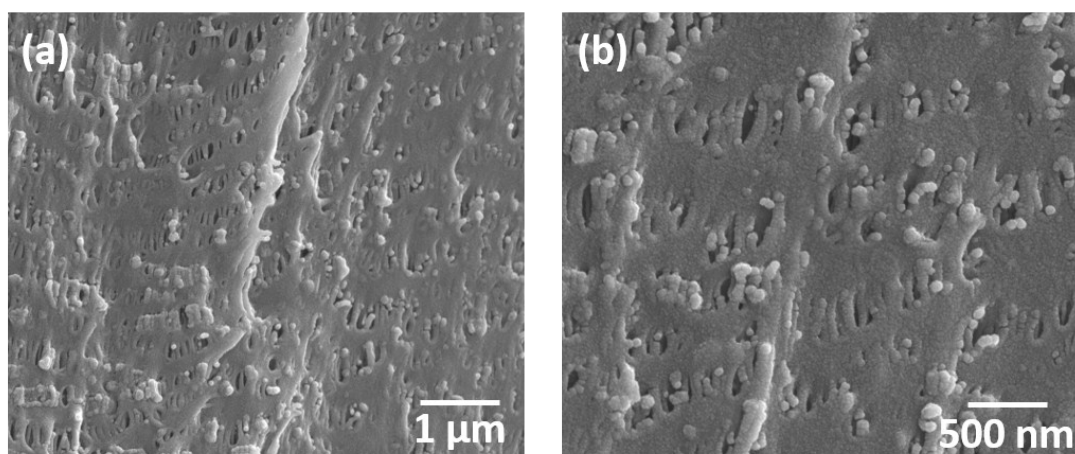

**Figure S1.** (a) – (b) SEM images of PPy@CS with different magnifications.

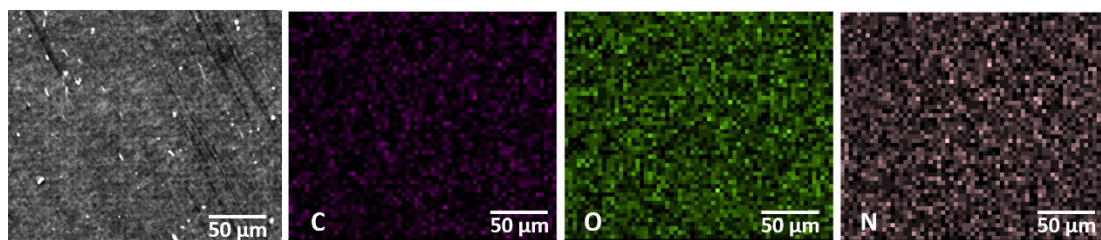

**Figure S2.** EDS mappings of PPy@CS.

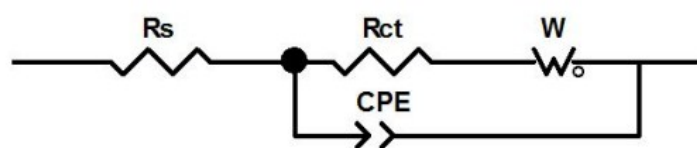

**Figure S3.** Equivalent circuit of Nyquist plots shown in Figure 4c.  $R_s$ ,  $R_{ct}$  and  $CPE$  represent the resistance of the electrolyte, the charge transfer resistance and the capacitance of the electrical double layer, respectively.
